# Supplementary material
Source: Springer Nature journal article supplement (https://www.springermedizin.de/resource/supplementary/40248_2014_200_MOESM9_ESM.pdf/9686204)

**A**

1 =not important      6 =very important

■ GPs ■ Specialists

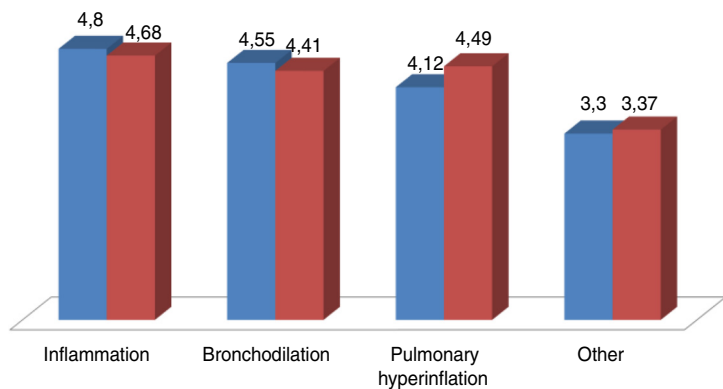**B**

N° GPs or Specialists

■ GPs ■ Specialists

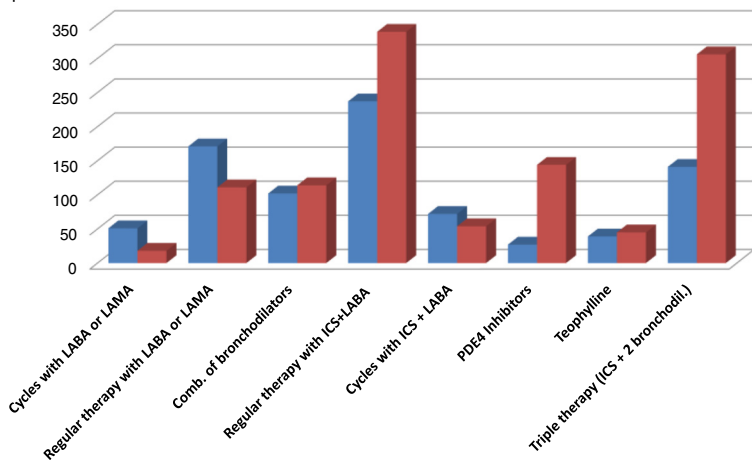

Supplement: MOESM9 [file 9686204]
